# Supplementary material
Source: publisher figshare collection journal article supplement (https://acs.figshare.com/ndownloader/files/5794671)
Supplement: Supplementary file 1 [file 5794671]

#### Terms & Conditions

Electronic Supporting Information files are available without a subscription to ACS Web Editions. The American Chemical Society holds a copyright ownership interest in any copyrightable Supporting Information. Files available from the ACS website may be downloaded for personal use only. Users are not otherwise permitted to reproduce, republish, redistribute, or sell any Supporting Information from the ACS website, either in whole or in part, in either machine-readable form or any other form without permission from the American Chemical Society. For permission to reproduce, republish and redistribute this material, requesters must process their own requests via the RightsLink permission system. Information about how to use the RightsLink permission system can be found at <http://pubs.acs.org/page/copyright/permissions.html>

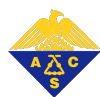

**ACS Publications**

MOST TRUSTED. MOST CITED. MOST READ.

Copyright © 1996 American Chemical Society

**Supplementary Material for:****The Synthesis of Novel Nucleic Acid Mimics *via* the Stereoselective Intermolecular Radical Coupling of 3'-Iodo Nucleosides and Formaldoximes**

Balkrishen Bhat,\* Eric E. Swayze, Patrick Wheeler, Stuart Dimock,

Michel Perbost† and Yogesh S. Sanghvi

Isis Pharmaceuticals, Medicinal Chemistry Department,

2292 Faraday Avenue, Carlsbad, CA 92008

**Experimental Section****2',3'-Dideoxy-3'-iodo-5-methyl-5'-O-(triphenylmethyl)cytidine (6c).**

To 1,2,4-triazole (2.38 g, 34.4 mmol) in dry MeCN (30 mL) under argon at 0 °C was added POCl<sub>3</sub> (0.75 mL, 8 mmol) dropwise with vigorous stirring. Et<sub>3</sub>N (5.56 mL, 40 mmol) was added dropwise over 0.5 h, and the thick suspension was stirred at 0 °C for an additional 0.5 h. 3'-Deoxy-3'-iodo-5'-O-(triphenylmethyl)thymidine 1.19 g (2.0 mmol) was added in one portion, and the mixture allowed to warm to rt over 3 h. The mixture was then cooled to 0 °C, and Et<sub>3</sub>N (5.5 mL) and water (0.55 mL) were added, the mixture allowed to warm to room temperature with stirring, then concentrated to a small volume. The residue was partitioned between EtOAc (50 mL) and 5% NaHCO<sub>3</sub> (50 mL), and the organic layer washed with 5% NaHCO<sub>3</sub> (2 x 50 mL), water (2 x 50 mL), brine, then dried (MgSO<sub>4</sub>) and concentrated to a foam, which was azeotroped with toluene, then CH<sub>2</sub>Cl<sub>2</sub>. This material was dissolved in dry 1,4-dioxane (25 mL), saturated with anhydrous NH<sub>3</sub> at rt, then stirred at rt under a balloon filled with anhydrous NH<sub>3</sub> overnight. The solvent was removed, and the residue dissolved in EtOAc (25 mL), washed with 5% NaHCO<sub>3</sub> (2 x 25 mL), brine, then dried (MgSO<sub>4</sub>) and concentrated to a foam: *R*<sub>f</sub> 0.46 (10%

MeOH/CH<sub>2</sub>Cl<sub>2</sub>); <sup>1</sup>H NMR (CDCl<sub>3</sub>) δ 7.86 (s, 1H), 7.50-7.20 (m, 15H), 6.09 (t, *J*=4.8 Hz, 1H), 4.43 (dd, 1H), 4.26 (m, 1H), 3.56 (m, 2H), 2.84 (m, 2H), 1.43 (s, 3H). Anal. Calcd for C<sub>29</sub>H<sub>28</sub>N<sub>3</sub>O<sub>3</sub>I: C, 58.69; H, 4.76; N, 7.08. Found: C, 58.81; H, 4.92; N, 6.76.

**3'-*O*-*tert*-Butyldiphenylsilyl-5'-*O*- (methyleneimino)thymidine (7a).**

5'-*O*-Amino-3'-*O*-*tert*-butyldiphenylsilyl-thymidine<sup>1</sup> (5.0 g, 10 mmol) was suspended in EtOAc/MeOH (25 mL + 25 mL), formaldehyde (20 % w/w aqueous, 1.60 mL, 10.5 mmol) was added, and the mixture stirred 1 h at rt. The solution was concentrated, then chromatographed (50% EtOAc/hexane) to afford 4.79 g (94%) of **7a**: mp 166-167 °C; *R<sub>f</sub>* 0.51 (% 50% EtOAc/hexane); <sup>1</sup>H NMR (CDCl<sub>3</sub>) δ 8.29 (s, 1H), 7.62 (m, 4H), 7.45 (m, 6H), 7.29 (s, 1H), 6.90 (d, 2H), 6.42 (m, 2H), 4.44 (m, 1H), 4.10 (m, 2H), 3.78 (dd, 1H), 2.35 (ddd, 1H), 1.85 (s, 3H), 1.82 (m, 1H), 1.09 (s, 9H). Anal. Calcd for C<sub>27</sub>H<sub>33</sub>N<sub>3</sub>O<sub>5</sub>Si: C, 63.88; H, 6.55; N, 8.28. Found: C, 63.77; H, 6.50; N, 8.20.

**3'-*O*-*tert*-Butyldiphenylsilyl-2'-deoxy-5'-*O*-phthalimidoadenosine.** To

5'-*O*-phthalimido-2'-deoxyadenosine<sup>2</sup> 0.40 g (1 mmol) and imidazole (0.18 g, 2.6 mmol) in dry DMF (5 mL) was added *tert*-butyldiphenylsilyl chloride (0.31 mL, 1.2 mmol), and the reaction mixture was stirred at rt for 18 h. The solution was partitioned between water (50 mL) and EtOAc (25 mL), the organic layer washed with water (2 x 25 mL) and brine, then dried (MgSO<sub>4</sub>) and concentrated to afford 0.60 g (94%) of crude product (containing only traces of silyl by-products), which could be used directly for the next step. A portion of material so obtained was chromatographed (0 to 10% MeOH/CH<sub>2</sub>Cl<sub>2</sub>) to provide an analytical sample: *R<sub>f</sub>* 0.46 (10% MeOH/CH<sub>2</sub>Cl<sub>2</sub>); <sup>1</sup>H NMR (CDCl<sub>3</sub>) δ 8.30 (s, 2H), 7.85-7.60 (m, 8H), 7.40 (m, 6H), 6.57 (t, *J*=6.9 Hz, 1H), 5.73 (s, 2H), 4.83 (m, 1H), 4.28 (m, 1H), 4.08 (dd, 1H), 3.94 (dd, 1H), 2.60 (m, 2H), 1.13 (s, 9H). Anal. Calcd for C<sub>34</sub>H<sub>34</sub>N<sub>6</sub>O<sub>5</sub>Si•0.5 H<sub>2</sub>O: C, 63.43; H, 5.48; N, 13.05. Found: C, 63.24; H, 5.29; N, 13.03.

**3'-O-*tert*-Butyldiphenylsilyl-2'-deoxy-5'-O-**

**(methylenimine)adenosine (7b).** 3'-O-*tert*-Butyldiphenylsilyl-2'-deoxy-5'-O-phthalimidoadenosine (1.05 g, 1.65 mmol) was dissolved in CH<sub>2</sub>Cl<sub>2</sub> (17 mL), cooled to 0 °C, and methylhydrazine (0.11 mL, 1.98 mmol) was added dropwise. The mixture was stirred at 0 °C for 0.5 h, filtered, and the solid washed twice with cold CH<sub>2</sub>Cl<sub>2</sub>. The combined filtrates were diluted with toluene (6 mL), then concentrated and combined with an additional portion (0.95 g, 1.88 mmol) of 5'-O-amino-3'-O-*tert*-butyldiphenylsilyl-2'-deoxyadenosine prepared in a similar manner. This solid was suspended in EtOAc/MeOH (17 mL + 17 mL), formaldehyde (20 % w/w aqueous, 0.53 mL, 3.53 mmol) was added, and the mixture stirred 1 h at 40 °C. The solution was concentrated, then chromatographed (80% EtOAc/hexane to 5% MeOH in 80% EtOAc/hexane) to afford 1.33 g (73%) of **7b**: *R<sub>f</sub>* 0.47 (5% MeOH in 80% EtOAc/hexane); <sup>1</sup>H NMR (CDCl<sub>3</sub>) δ 8.32 (s, 1H), 7.93 (s, 1H), 7.65 (m, 4H), 7.41 (m, 6H), 6.88 (d, *J*=7.9 Hz, 1H), 6.50 (t, *J*=6.6 Hz, 1H), 6.35 (d, *J*=7.9 Hz, 1H), 5.70 (s, 2H), 4.65 (dd, 1H), 4.28 (dd, 1H), 4.15 (dd, 1H), 3.92 (dd, 1H), 2.51 (m, 2H), 1.11 (s, 9H). Anal. Calcd for C<sub>27</sub>H<sub>32</sub>N<sub>6</sub>O<sub>3</sub>Si: C, 62.77; H, 6.24; N, 16.27. Found: C, 62.77; H, 6.11; N, 15.94.

**3'-O-*tert*-Butyldiphenylsilyl-2'-deoxy-2-N-**

**(dimethylamino)methylene-5'-O- (methylenimine)guanosine (7c).** This material was prepared from 2'-deoxyguanosine according to the general procedures described for the 2'-O-methyl series in 61% overall yield: *R<sub>f</sub>* 0.38 (10% MeOH/CH<sub>2</sub>Cl<sub>2</sub>); <sup>1</sup>H NMR (DMSO-*d*<sub>6</sub>) δ 11.34 (s, 1H), 8.49 (s, 1H), 7.91 (s, 1H), 7.62 (m, 4H), 7.42 (m, 6H), 6.94 (d, *J*=7.5 Hz, 1H), 6.52 (d, *J*=7.5 Hz, 1H), 6.34 (dd, *J*=6.1, 8.2 Hz, 1H), 4.57 (m, 1H), 4.17 (dd, 1H), 4.55 (dd, 1H), 3.96 (dd, 1H), 3.08 (s, 3H), 3.01 (s, 3H), 2.71 (m, 1H), 2.24 (m, 1H), 1.05 (s, 9H). Anal. Calcd for C<sub>30</sub>H<sub>37</sub>N<sub>7</sub>O<sub>4</sub>Si•0.25 H<sub>2</sub>O: C, 60.84; H, 6.38; N, 16.55. Found: C, 60.80; H, 6.49; N, 16.46.

**3'-De(oxyphosphinico)-3'-(methylenimine)-5'-O-**

**(triphenylmethyl)thymidylyl-(3'→5')-3'-O-(*tert*-**

**butyldiphenylsilyl)thymidine (9a).** **Method 1:** From 0.59 g (1.0 mmol) of 3'-deoxy-3'-iodo-5'-O-(triphenylmethyl)thymidine (**6a**) and 1.52 g (3.0 mmol) of 3'-O-*tert*-butyldiphenylsilyl-5'-O-(methyleneimino)thymidine (**7a**) according to the general procedure was obtained unreacted oxime (0.84 g, 75% of unreacted material) upon elution of the column with 50% EtOAc/hexane, and 0.80 g (82%) of the dimer **9a** upon elution with 10% MeOH/CH<sub>2</sub>Cl<sub>2</sub>. **Method 2:** From the 3'-iodide (713 mg, 1.2 mmol), oxime (508 mg, 1.0 mmol), and bis(trimethylstannyl)benzopinacolate (2.08 g, 3.0 mmol) according to the general procedure was obtained 789 mg (81%, based on oxime) of **9a** after chromatography as described for method 1. **Method 3:** A solution of Bu<sub>3</sub>SnH (0.19 mL, 0.7 mmol) and AIBN (30 mg, 0.18 mmol) in degassed benzene (0.50 mL) was added via syringe pump to a solution of the 3'-iodide (297 mg, 0.50 mmol) and the oxime (762 mg, 1.5 mmol) in degassed benzene (5 mL) over 24 h at 80 °C. The mixture was cooled, treated with EtOAc/KF as described in the general procedure, then chromatographed as described for method 1 to yield 623 mg of unreacted oxime (88% of unreacted material), 66 mg (28%) of 3'-deoxy-5'-(triphenylmethyl)thymidine, and 232 mg (48%) of **9a**. Dimeric material obtained by each method was identical, and gave the following data: *R<sub>f</sub>* 0.30 (70% EtOAc/hexane); <sup>1</sup>H NMR (CDCl<sub>3</sub>) δ 8.51 (s, 1H), 8.46 (s, 1H), 7.65-7.05 (m, 27H), 6.32 (t, *J*=6.8, 1H), 6.10 (t, *J*=5.5, 1H), 5.30 (t, 1H), 4.26 (m, 1H), 4.03 (m, 1H), 3.82 (m, 1H), 3.49 (m, 2H), 3.35 (m, 2H), 2.77 (m, 2H), 2.53 (m, 1H), 2.33 (m, 1H), 2.21 (m, 2H), 1.83 (m, 1H), 1.78 (s, 3H), 1.51 (s, 3H), 1.07 (s, 9H). Anal. Calcd for C<sub>56</sub>H<sub>61</sub>N<sub>5</sub>O<sub>9</sub>Si: C, 68.90; H, 6.30; N, 7.17. Found: C, 68.61; H, 6.31; N, 7.10.

**3'-De(oxyphosphinico)-3'-(methyleneimino)-5'-O-(*tert*-butyldiphenylsilyl)thymidylyl-(3'→5')-3'-O-(*tert*-butyldiphenylsilyl)thymidine (9b).** From 0.59 g (1.0 mmol) of 5'-O-*tert*-butyldiphenylsilyl-3'-deoxy-3'-iodo-thymidine (**6b**) and 1.52 g (3.0 mmol) of 3'-O-*tert*-butyldiphenylsilyl-5'-O-(methyleneimino)thymidine (**7a**) according to the general

procedure was obtained unreacted oxime (1.10 g, 99% of unreacted material) upon elution of the column with 50% EtOAc/hexane, and 0.78 g (81%) of **9b** upon elution with 10% MeOH/1:1 EtOAc/hexane:  $R_f$  0.36 (10% MeOH/1:1 EtOAc-hexane);  $^1\text{H}$  NMR ( $\text{CDCl}_3$ )  $\delta$  8.58 (bs, 2H), 7.66 (m, 8H), 7.41 (m, 13H), 7.18 (s, 1H), 6.34 (t,  $J=6.8$ , 1H), 6.10 (t,  $J=6.1$ , 1H), 5.34 (t, 1H), 4.28 (m, 1H), 4.10-3.25 (m, 5H), 2.82 (m, 2H), 2.58-2.10 (m, 3H), 1.88 (m, 1H), 1.82 (s, 3H), 1.63 (s, 3H), 1.07 (s, 18H). Anal. Calcd for  $\text{C}_{53}\text{H}_{65}\text{N}_5\text{O}_9\text{Si}_2\cdot\text{H}_2\text{O}$ : C, 64.28; H, 6.82; N, 7.07. Found: C, 64.08; H, 6.81; N, 6.95.

**3'-De(oxyphosphinico)-2'-deoxy-5-methyl-3'-(methyleneimino)-5'-O-(triphenylmethyl)cytidyl-(3'→5')-3'-O-(tert-butyldiphenylsilyl)thymidine (9c).** From 297 mg (0.5 mmol) of **6c** and 760 mg (1.5 mmol) of **7a** according to the general procedure was obtained unreacted oxime (0.59 g, 97% of unreacted material) upon elution of the column with 50% EtOAc/hexane, and 0.29 g (58%) of **9c** upon elution with 7% MeOH/ $\text{CH}_2\text{Cl}_2$ :  $R_f$  0.30 (7% MeOH/ $\text{CH}_2\text{Cl}_2$ );  $^1\text{H}$  NMR ( $\text{CDCl}_3$ )  $\delta$  7.80 (s, 1H), 7.70-7.20 (m, 25H), 7.16 (s, 1H), 6.31 (dd,  $J=6.0$ , 7.5 Hz, 1H), 6.10 (t,  $J=6.8$  Hz, 1H), 5.25 (bs, 1H), 4.26 (m, 1H), 4.00 (m, 1H), 3.85 (m, 1H), 3.51 (m, 2H), 3.24 (m, 2H), 2.76 (m, 2H), 2.50-2.20 (m, 4H), 1.80 (m, 1H), 1.76 (s, 3H), 1.50 (s, 3H), 1.07 (s, 9H). Anal. Calcd for  $\text{C}_{56}\text{H}_{62}\text{N}_6\text{O}_8\text{Si}\cdot 0.5 \text{H}_2\text{O}\cdot 0.15 \text{EtOAc}$  (EtOAc evident in  $^1\text{H}$  NMR): C, 68.16; H, 6.49; N, 8.43. Found: C, 68.41; H, 6.31; N, 8.06.

**3'-De(oxyphosphinico)-3'-(methyleneimino)-5'-O-(triphenylmethyl)thymidylyl-(3'→5')-3'-O-(tert-butyldiphenylsilyl)-2'-deoxyguanosine (9e).** From 297 mg (0.5 mmol) of **6b** and 880 mg (1.5 mmol) of **7c** according to the general procedure was obtained a mixture of products after elution of the column with 20% MeOH/ $\text{CH}_2\text{Cl}_2$ . TLC analysis of this mixture (10% MeOH/ $\text{CH}_2\text{Cl}_2$ , 3 developments) indicated the presence of four major nucleosidic products, presumably resulting from partial loss of the dimethylformamidine protecting group. The mixture was dissolved in 1,4-dioxane (5 mL), concentrated aqueous ammonia (5 mL) was added, and the mixture was stirred at 55 °C in a sealed vessel for 2 h. The resulting clear solution was

cooled in an ice bath, and the solvent removed in vacuo. The solid residue was triturated with EtOAc (25 mL, 1h at 40 °C, with stirring), filtered, washed with EtOAc, and dried to provide 0.54 g of 3'-*O*-*tert*-butyldiphenylsilyl-2'-deoxy-5'-*O*-(methyleneimino)guanosine (81% based on unreacted oxime). This material could be converted back to the dimethylformamidine protected starting material in nearly quantitative yield.<sup>3</sup> The combined filtrates were concentrated and chromatographed (5% MeOH in 7:3 MeCN/CH<sub>2</sub>Cl<sub>2</sub> to 10% MeOH/CH<sub>2</sub>Cl<sub>2</sub>) to provide an additional 80 mg of the deblocked oxime (8%, total recovery 91%), and 230 mg (46%) of **9e**: *R<sub>f</sub>* 0.63 (10% MeOH/CH<sub>2</sub>Cl<sub>2</sub>); <sup>1</sup>H NMR (CDCl<sub>3</sub>) δ 12.13 (s, 1H), 9.67 (s, 1H), 7.70-7.60 (m, 5H), 7.57 (s, 1H), 7.45-7.10 (m, 21H), 6.24 (t, *J*=6.5 Hz, 1H), 6.12 (bs, 2H), 6.02 (t, *J*=5.2 Hz, 1H), 5.68 (bs, 1H), 4.49 (m, 1H), 4.09 (m, 1H), 3.81 (m, 1H), 3.48 (m, 3H), 3.19 (m, 1H), 2.72 (m, 2H), 2.48 (m, 3H), 2.12 (m, 2H), 1.48 (s, 3H), 1.08 (s, 9H); <sup>13</sup>C NMR (CDCl<sub>3</sub>) δ 164.25, 158.85, 153.49, 151.25, 150.52, 143.44, 143.33, 136.36, 135.77, 135.72, 133.22, 133.07, 130.06, 128.64, 127.94, 127.86, 127.27, 117.46, 110.41, 87.05, 86.00, 85.35, 84.26, 83.28, 77.21, 73.71, 73.40, 63.92, 53.24, 40.11, 37.47, 36.99, 26.88, 19.07, 12.08. Anal. Calcd for C<sub>59</sub>H<sub>64</sub>N<sub>8</sub>O<sub>8</sub>Si: C, 67.18; H, 6.04; N, 11.19. Found: C, 67.57; H, 6.00; N, 11.23.

**6-*N*-[1-(Dimethylamino)ethylene]-2'-*O*-methyladenosine (10c)** 2'-*O*-methyladenosine (**10b**, 5.0 g, 17.8 mmol) was dried over P<sub>2</sub>O<sub>5</sub> at 40 °C for 24h. It was then azeotroped with anhydrous pyridine (20mL x 2) and the residue dried under reduced pressure for 1.5 h. After taking up in anhydrous MeOH (20 mL), dimethylacetamide dimethylacetal (8.48 g, 63.6 mmol) was added, and the reaction mixture was stirred at room temperature for 36 h. It was concentrated to an oil, dissolved in EtOAc (100 mL) and washed with water (2 x 20 mL). The organic layer was dried over anhydrous Na<sub>2</sub>SO<sub>4</sub> and concentrated. It was purified by column chromatography on silica gel (5-7% MeOH/CH<sub>2</sub>Cl<sub>2</sub>) to provide 5.6 g (90%) of **10c** as a colorless foam: <sup>1</sup>H NMR(DMSO-*d*<sub>6</sub>) δ 8.50 (s, 1H), 8.45 (s, 1H), 6.07 (d, *J*=5.3, 1H), 5.32(bs, 2H, D<sub>2</sub>O exchangeable), 4.43-

4.28 (m, 2H), 4.01-3.99 (m, 1H), 3.80-3.55 (m, 3H), 3.33 (s, 3H), 3.12 (s, 6H), 2.07 (s, 3H); MS (FAB<sup>+</sup>) *m/e* 351 (M+H). Anal. Calcd for C<sub>15</sub>H<sub>22</sub>N<sub>6</sub>O<sub>4</sub>·0.25 H<sub>2</sub>O: C, 50.77; H, 6.39; N, 23.68. Found: C, 50.58; H, 6.50; N, 23.38.

**2-*N*-Isobutyryl-2'-*O*-methylguanosine (10e).** Dried **10d** (5.0 g, 16.8 mmol) was azeotroped with anhydrous pyridine (30 mL). After dissolving the residue in anhydrous pyridine (80 mL), TMSCl (14.0 mL, 110 mmol) was added and the reaction mixture was allowed to stir at room temperature for 17 h. To this was added isobutyryl chloride (9.35 g, 89.5 mmol) and the stirring was continued for an additional 5 h. It was quenched with water (20 mL) and cooled to 0 °C. To this was added NH<sub>4</sub>OH (25 mL). It was stirred at this temperature for 30 m, and the separated solid was removed by filtration, then washed with hexane (3 x 20 mL). The mother liquor was concentrated to a small volume, water (15 mL) and EtOAc (30 mL) were added, and the residue and left overnight at rt. The precipitate was filtered and the combined solid was recrystallized from CH<sub>3</sub>CN to give 4.1 g (68%) of a colorless solid: <sup>1</sup>H NMR (DMSO-*d*<sub>6</sub>) δ 12.05 (s, 1H); 11.70 (s, 1H); 8.28 (s, 1H); 5.82 (d, *J*=6.02 Hz, 1H), 4.29-4.22 (m, 2H), 3.90-3.88 (m, 1H), 3.55-3.50 (m, 2H); 3.27 (s, 3H), 2.77 (m, 1H); 1.06-1.03 (d, 6H); MS (FAB<sup>+</sup>) *m/e* 368 (M+H). Anal. Calcd for C<sub>15</sub>H<sub>21</sub>N<sub>5</sub>O<sub>6</sub>·H<sub>2</sub>O: C, 46.75; H, 6.02; N, 18.17. Found: C, 46.90; H, 6.13; N, 18.52.

**2-*N*-(Dimethylamino)methylene-2'-*O*-methylguanosine (10f).** A mixture of dry 2'-*O*-methylguanosine (5.0 g, 16.8 mmol), *N,N'*-dimethylformamide diethylacetal (9.87 g, 67 mmol) in anhydrous MeOH (100mL) was stirred at room temperature for 24 h., when the TLC (10%MeOH/CH<sub>2</sub>Cl<sub>2</sub>) indicated the reaction was complete. Solvent was removed under reduced pressure and the light brown syrup was azeotroped with acetonitrile (3x20 mL). Finally, trituration of the residue with CH<sub>3</sub>CN (50 ml) furnished a solid which was filtered and dried. The mother liquor was concentrated to a smaller volume and left overnight to furnish additional solid which was filtered. The total yield of **10f** was 5.7 g (96%): mp 198-201 °C; <sup>1</sup>HNMR (DMSO-*d*<sub>6</sub>) δ 11.36 (s, 1H),



8.53 (s, 1H), 8.08 (s, 1H), 5.90 (d,  $J=5.86$  Hz, 1H), 5.25 (d,  $J=4.90$  Hz, 1 H), 5.0-5.2 (m, 1H), 4.1-4.4 (m, 2H), 3.8-4.0 (m, 1H), 3.4-3.7 (m, 2H), 3.31 (s, 3H), 3.14 (s, 3H), 3.02 (s, 3H); MS (FAB<sup>+</sup>)  $m/e$  351 (M+H). Anal. Calcd for C<sub>14</sub>H<sub>20</sub>N<sub>6</sub>O<sub>5</sub>·0.5 H<sub>2</sub>O: C, 46.53; H, 5.86; N, 23.26. Found: C, 46.18; H, 5.93; N, 23.07.

**5'-O-(4,4'-Dimethoxytriphenylmethyl)-6-N-[1-(dimethylamino)ethylene]-2'-O-methyladenosine (11b).** A solution of **10c** (6.0 g, 17.16 mmol), DMTCI (7.1 g, 21 mmol and DMAP (0.7 g, 5.7 mmol) in anhydrous pyridine (50 mL) was stirred at room temperature for 4 h. It was poured into ice water (100 mL) and extracted with EtOAc (150 mL x 2). The organic layer was dried over Na<sub>2</sub>SO<sub>4</sub> and concentrated. Purification by flash chromatography on silica gel using 5-7% MeOH-CH<sub>2</sub>Cl<sub>2</sub> gave 7.5 g (67.5%) of **11b** as a light yellow foam: <sup>1</sup>H NMR (CDCl<sub>3</sub>) δ 8.55 (s, 1H), 8.08 (s, 1H), 7.45-7.19 (m, 9H), 6.82-6.78 (m, 4H), 6.19 (d,  $J=4$ Hz, 1H), 4.52-4.41 (m, 2H), 4.26-4.18 (m, 1H), 3.77-3.70 (m, 8H), 3.55 (s, 3H), 3.20-3.14 (bs, 6H), 2.15 (s, 3H); MS (FAB<sup>+</sup>)  $m/e$  653 (M+H). Anal. Calcd for C<sub>36</sub>H<sub>40</sub>N<sub>6</sub>O<sub>6</sub>·0.5 H<sub>2</sub>O: C, 65.34; H, 6.24; N, 12.70. Found: C, 65.37; H, 6.20; N, 12.35.

**5'-O-(4,4'-Dimethoxytriphenylmethyl)-2-N-isobutryl-2'-O-methylguanosine (11c).** A solution of **10e** (2.12 g, 5.01 mmol) in anhydrous pyridine (20 mL) was azeotroped under reduced pressure. It was re-dissolved in anhydrous pyridine (18 mL) and after adding DMTCI (2.11 g, 6.2 mmol) and DMAP (9.21 g, 1.7 mmol), the reaction mixture was stirred at room temperature for 6 h. The reaction mixture was poured into cold water (60 mL) and it was extracted with EtOAc (2 x 60 mL). The organic layer was dried over anhydrous Na<sub>2</sub>SO<sub>4</sub> and solvent removed under reduced pressure at 35 °C. The residual oil thus obtained was purified by column chromatography using 3-7% MeOH/CH<sub>2</sub>Cl<sub>2</sub> (trace of Et<sub>3</sub>N, 5 drops/L). Appropriate fractions were collected and concentrated which after drying overnight under reduced pressure furnished 2.94 g (82%) **11c** as a light yellow foam: <sup>1</sup>H NMR (DMSO-*d*<sub>6</sub>) δ 12.13 (s, 1H), 11.65 (s, 1H), 8.18 (s, 1H), 7.39-7.23 (m, 9H), 6.88-6.82 (m, 4H), 5.99 (d,  $J=6$  Hz, 1H), 5.30

(d,  $J=6$  Hz, 1H), 4.41-4.31 (m, 2H), 4.09-4.06 (m, 1H), 3.74 (s, 6H), 3.42 (s, 3H), 3.31-3.20 (m, 2H), 2.84-2.66 (m, 1H), 1.16-1.13 (m, 6H); MS (FAB<sup>+</sup>)  $m/e$  670 (M+H). Anal. Calcd for C<sub>36</sub>H<sub>39</sub>N<sub>5</sub>O<sub>8</sub>•0.5 H<sub>2</sub>O: C, 63.71; H, 5.94; N, 10.32. Found: C, 63.84; H, 6.10; N, 10.13.

**5'-O-(4,4'-Dimethoxytriphenylmethyl)-2-N-(dimethylamino)methylene-2'-O-methylguanosine (11d).** A mixture of **10f** (3.0 g, 8.2 mmol) DMTCI (3.46 g, 12.2 mmol) and DMAP (0.35 g, 2.86 mmol) in anhydrous pyridine (20 mL) was stirred at room temperature for 5 h, at which point TLC (10% MeOH/CH<sub>2</sub>Cl<sub>2</sub>) on silica gel indicated the reaction was complete. It was poured into cold water (100 mL) and extracted with EtOAc (2 x 60 mL). The Organic layer was dried over anhydrous Na<sub>2</sub>SO<sub>4</sub> and concentrated. Purification by flash chromatography using 3-5% MeOH/CH<sub>2</sub>Cl<sub>2</sub> (Et<sub>3</sub>N, 5 drop/L) and after concentrating the appropriate fractions followed by drying under high vacuum gave 3.5 g (63%) of **11d** as a light yellow foam: <sup>1</sup>H NMR (DMSO-*d*<sub>6</sub>)  $\delta$  11.42 (s, 1H), 8.52 (s, 1H), 7.96 (s, 1H), 7.39-7.22 (m, 9H), 6.88-6.83 (m, 4H), 5.98 (d,  $J=4$  Hz, 1H), 5.31 (d,  $J=5.7$  Hz, 1H), 4.40-4.27 (m, 2H), 4.15-3.95 (m, 1H), 3.91 (bs, 2H), 3.74 (s, 6H), 3.39 (s, 3H), 3.11 (s, 3H), 3.04 (s, 3H); MS (FAB<sup>+</sup>)  $m/e$  655 (M+H). Anal. Calcd. for C<sub>35</sub>H<sub>38</sub>N<sub>6</sub>O<sub>7</sub>•1.5 H<sub>2</sub>O: C, 61.66; H, 6.06; N, 12.33. Found: C, 61.95; H, 5.81; 12.19.

**5'-O-*tert*-Butyldiphenylsilyl-2'-O-methyl-5-methyluridine (11e).** A solution of **10a** (2 g, 7.34 mmol), *tert*-butyldiphenylsilyl chloride (1.73 g, 6.29 mmol) and DMAP (0.01 g, 0.15 mmol) in anhydrous pyridine (7 mL) was stirred for 18 h. After the reactions was complete, it was concentrated to a smaller volume and diluted with EtOAc (50 mL), washed with water (2 x 10 mL), and dried over anhydrous Na<sub>2</sub>SO<sub>4</sub>. Solvent was removed under reduced pressure and the residue purified by column chromatography using 2-5% MeOH/CH<sub>2</sub>Cl<sub>2</sub>. Appropriate fractions were pooled and concentrated to give 3.0 g (80%) of **11e** as a colorless foam: <sup>1</sup>H NMR (DMSO-*d*<sub>6</sub>)  $\delta$  11.44 (s, 1H), 7.70-7.42 (m, 10H), 5.95 (d,  $J=6$  Hz, 1H), 5.30 (bs, 1H), 4.28 (bs, 1H), 3.98-3.80 (m, 3H), 3.39 (s,

3H), 1.48 (s, 3H), 1.06 (s, 9H); MS (FAB<sup>+</sup>) *m/e* 511 (M+H). Anal. Calcd for C<sub>27</sub>H<sub>34</sub>N<sub>2</sub>O<sub>6</sub>Si: C, 63.51; H, 6.71; N, 5.49. Found: C, 63.20; H, 6.69; N, 5.42.

**5'-O-(*tert*-Butyldiphenylsilyl)-2'-O-methyladenosine (11f)** A mixture of dried **10b** (5.0 g, 17.8 mmol), TBDPSCl (6.10 g, 22.2 mmol) and DMAP (0.4 mmol) in anhydrous pyridine (15 mL) was stirred at room temperature for 15 h when TLC (10% MeOH/CH<sub>2</sub>Cl<sub>2</sub>) indicated the completion of the reaction. The reaction mixture was concentrated, taken up in EtOAc (100 mL) and washed with water (2 x 20 mL). The organic layer was concentrated, and residue purified by flash chromatography (5-7% MeOH/CH<sub>2</sub>Cl<sub>2</sub>) to give 8 g (86%) of the desired 5'-protected analog as colorless foam: <sup>1</sup>H NMR (DMSO-*d*<sub>6</sub>) δ 8.28 (s, 1H), 8.11 (s, 1H), 7.65-7.34 (m, 10H), 6.07 (d, *J*=4 Hz, 1H), 5.36 (d, *J*=6 Hz, 1H), 4.55-4.41 (m, 2H), 4.10-3.75 (m, 3H), 3.37 (s, 3H); MS (FAB<sup>+</sup>) *m/e* 520 (M+H). Anal. Calcd for C<sub>27</sub>H<sub>33</sub>N<sub>5</sub>O<sub>4</sub>Si: C, 62.40; H, 6.40; N, 13.48. Found: C, 62.62; H, 6.49; N, 13.23.

**6-N-[1-(Dimethylamino)ethylene]-5'-O-*tert*-butyldiphenylsilyl-2'-O-methyladenosine (11g).** A solution of **10c** (1 g, 2.8 mmol), TBDPSCl (1.1 g, 4 mmol) and DMAP (0.020 g, 0.3 mmol) in anhydrous pyridine (5 mL) was stirred at room temperature for 15 h. The solution was concentrated to a smaller volume and taken up in EtOAc (30 mL) and washed with water (2 x 10 mL). The organic layer was dried over anhydrous Na<sub>2</sub>SO<sub>4</sub> and concentrated. It was flash chromatographed on silica gel using 80:18:2, CH<sub>2</sub>Cl<sub>2</sub>:CH<sub>3</sub>COCH<sub>3</sub>:MeOH mixture as the eluent. The product fractions were concentrated to a colorless foam to yield 1.2 g (72%) of **11g**: <sup>1</sup>H NMR (DMSO-*d*<sub>6</sub>) δ 8.39 (s, 1H), 8.37 (s, 1H), 7.64-7.36 (m, 10H), 6.10 (d, *J*=4 Hz, 1H), 5.38 (d, *J*=4 Hz, 1H), 4.52-4.47 (m, 2H), 4.10-3.75 (m, 1H), 3.38 (s, 3H), 3.12 (bs, 6H), 2.05 (s, 3H), 0.99 (s, 9H).

**5'-O-*tert*-Butyldiphenylsilyl-6-N-(dimethylamino)methylene-2'-O-methyladenosine (11h)** A solution of **11f** (5.0 g, 9.6 mmol) and *N,N'*-dimethylformamide diethylacetal (4.0 g, 27.7 mmol) in anhydrous MeOH (25 mL) was

allowed to stir at room temperature for 15 h. After concentrating, it was taken up in EtOAc (100 mL) and washed with water (2 x 20 mL), and the organic layer separated, then dried over anhydrous Na<sub>2</sub>SO<sub>4</sub>. The solvent was removed and the residue purified over silica gel to afford desired nucleoside 5.32 g (96%) as a colorless foam: <sup>1</sup>H NMR (DMSO-*d*<sub>6</sub>) δ 8.91 (s, 1H), 8.40 (s, 1H), 8.38 (s, 1H), 7.65-7.32 (m, 10H), 6.11 (d, *J*=6 Hz, 1H), 5.39 (d, *J*=6 Hz, 1H), 4.57-4.44 (m, 2H), 4.09-3.70 (m, 3H), 3.37 (s, 2H), 3.21 (2, 3H), 3.14 (s, 3H), 1.00 (s, 9H); MS (FAB<sup>+</sup>) *m/e* 575 (M+H). Anal. Calcd for C<sub>30</sub>H<sub>38</sub>N<sub>6</sub>O<sub>4</sub>Si: C, 62.69; H, 6.66; N, 14.62. Found: C, 62.31; H, 6.75; N, 14.71.

**5'-*O*-(*tert*-Butyldiphenylsilyl)-2'-*O*-methylguanosine (11i).** A suspension of 2'-*O*-methylguanosine (5.0 g, 16.8 mmol), TBDPSCl (5.8 g, 21.5 mmol) and DMAP (0.05 g, 0.4 mmol) in anhydrous pyridine (15 mL) was stirred at room temperature for 20 h, at which time the reaction was complete. After concentrated to a small volume, water was added to the reaction mixture, and when colorless solid separated, it was collected by filtration, washed thoroughly with water (2 x 20 mL) and ether (3 x 20 mL) respectively. The solid nucleoside analog (11i) was dried under reduced pressure to yield 8.1 g (89%) of 11i: <sup>1</sup>H NMR (DMSO-*d*<sub>6</sub>) δ 10.69 (s, 1H), 7.84 (s, 1H), 7.66-7.37 (m, 10 H), 6.51 (bs, 2H), 5.85 (d, *J*=6 Hz, 1H), 5.33 (d, *J*=6 Hz, 1H), 4.41-4.36 (m, 1H), 4.20-4.16 (m, 1H), 4.02-3.70 (m, 2H), 3.37 (s, 3H); MS (FAB<sup>+</sup>) *m/e* 536 (M+H). Anal. Calcd for C<sub>27</sub>H<sub>33</sub>N<sub>5</sub>O<sub>5</sub>Si•0.25 H<sub>2</sub>O: C, 60.04; H, 6.25; N, 12.96. Found: C, 60.29; H, 6.33; N, 12.64.

**5'-*O*-(*tert*-Butyldiphenylsilyl)-2-*N*-(dimethylamino)methylene-2'-*O*-methylguanosine (11j).** A solution of 11i (6.0 g, 11.2 mmol) and *N,N'*-dimethylformamide diethylacetal (4.72 g, 32.06 mmol) in anhydrous MeOH (25 mL) was stirred at room temperature for 18 h. After removing the solvent under reduced pressure, the residue was dissolved in EtOAc (100 mL) and washed with water (2 x 20 mL). The organic layer was concentrated and the residual oil purified by column chromatography using 3-6% MeOH/CH<sub>2</sub>Cl<sub>2</sub>. The product fractions were concentrated and dried to yield

6.17g (93%) of a colorless foam:  $^1\text{H}$  NMR ( $\text{DMSO}-d_6$ )  $\delta$  11.40 (s, 1H), 8.53 (s, 1H), 7.98 (s, 1H), 7.65-7.39 (m, 10H), 5.98 (d,  $J=6.0$  Hz, 1H), 5.38 (d, 1H), 4.45-3.70 (m, 5H), 3.39 (s, 3H), 3.11 (s, 3H), 3.03 (s, 3H), 1.01 (s, 9H); MS (FAB $^+$ )  $m/e$  591 (M+H). Anal. Calcd for  $\text{C}_{30}\text{H}_{38}\text{N}_6\text{O}_5\text{Si}\cdot 0.25 \text{H}_2\text{O}$ : C, 60.53; H, 6.52; N, 14.12. Found: C, 60.80; H, 6.53; N, 13.75.

**3'-Deoxy-5'-O-(4,4'-dimethoxytriphenylmethyl)-6-N-[1-(dimethylamino)ethylene]-3'-iodo-2'-O-methyladenosine (12b).** From **11b** (5 g, 7.6 mmol) according to general procedure A was obtained 3.1 g (60%) of **12b** after chromatography (20% acetone in  $\text{CH}_2\text{Cl}_2$ ) and precipitation by ether-hexane mixture:  $^1\text{H}$  NMR ( $\text{DMSO}-d_6$ )  $\delta$  8.43 (s, 1H), 8.14 (s, 1H), 7.45-7.22 (m, 9H), 6.90-6.86 (m, 4H), 4.86-4.72 (m, 2H), 3.97 (m, 1H), 3.73-3.62 (s, 6H), 3.44-3.39 (m, 5H), 3.10 (s, 6H), 1.23 (s, 3H); MS (FAB $^+$ )  $m/e$  763 (M+H). Anal. Calcd for  $\text{C}_{36}\text{H}_{39}\text{N}_6\text{O}_5\text{I}\cdot 0.5 \text{H}_2\text{O}$ : C, 56.04; H, 5.22; N, 10.89. Found: C, 56.20; H, 5.62; N, 10.69.

**3'-Deoxy-5'-O-(4,4'-dimethoxytriphenylmethyl)-2-N-(dimethylamino)methylene-3'-iodo-2'-O-methylguanosine (12d).** This compound was prepared by the general procedure A from 1.0 g (1.5 mmol) of **11d** after chromatography using 30% acetone/ $\text{CH}_2\text{Cl}_2$  as the eluent to give 0.61 g (52%) of **12d**:  $^1\text{H}$  NMR ( $\text{DMSO}-d_6$ )  $\delta$  11.44 (s, 1H), 8.58 (s, 1H), 7.85 (s, 1H), 7.44-7.24 (m, 9H), 6.89 (d,  $J=8$  Hz, 4H), 5.91 (d,  $J=2.8$  Hz, 1H), 4.89-4.87 (m, 1H), 4.73-4.71 (m, 1H), 3.90 (bs, 1H), 3.75 (s, 6H), 3.46 (s, 3H), 3.40-3.35 (m, 2H), 3.12 (s, 3H), 3.04 (s, 3H). mass spectrum (FAB)  $m/z$  765 ( $\text{MH}^+$ ). Anal. Calcd for  $\text{C}_{35}\text{H}_{37}\text{N}_6\text{O}_6\text{I}\cdot 0.5 \text{MeOH}$ : C, 54.62; H, 5.04; N, 10.77. Found: C, 55.01; H, 5.17; N, 10.51.

**3'-Deoxy-3'-iodo-2'-O-methyl-5-methyluridine (12h).** A mixture of **12a** (0.580 g, 0.847 mmol) and 1,1,1,3,3,3-hexafluoroisopropanol (5 mL) was stirred for 4 h. The solvent was removed under reduced pressure with a good trap and the residue was purified by flash chromatography using a mixture of 80:18:2  $\text{CH}_2\text{Cl}_2$ :acetone:MeOH as the eluent. Appropriate fractions were combined and concentrated to give 0.250 g (77%) of

**12h** as a colorless foam:  $^1\text{H}$  NMR (DMSO- $d_6$ )  $\delta$  11.47 (s, 1H), 7.72 (d,  $J=2$  Hz, 1H), 5.73 (d,  $J=3.6$  Hz, 1H), 5.21-5.10 (m, 1H), 4.66-4.62 (m, 1H), 4.40-4.37 (m, 1H), 3.72-3.5 (m, 3H), 3.40 (s, 3H), 1.82 (s, 3H);  $^{13}\text{C}$  NMR (DMSO- $d_6$ )  $\delta$  163.68, 150.25, 136.19, 109.34, 90.74, 88.37, 79.88, 66.15, 57.56, 26.91, 12.39; MS (FAB $^+$ )  $m/e$  383 (M+H). Anal. Calcd for  $\text{C}_{11}\text{H}_{15}\text{N}_2\text{O}_5\text{I}\cdot 0.25 \text{H}_2\text{O}$ : C, 34.17; H, 4.04; N, 7.24. Found: C, 34.55, H, 3.92; N, 6.92.

**3'-Deoxy-6-N-[1-(dimethylamino)ethylene]-3'-iodo-2'-O-methyladenosine (12i).** A similar procedure described for the preparation of compound **12h** gave from 0.225 g (0.29 mmol) of **12b**, 0.110 g (80%) of **12i** as a colorless compound:  $^1\text{H}$  NMR (DMSO- $d_6$ )  $\delta$  8.42 (s, 1H), 8.40 (s, 1H), 5.95 (bs, 1H), 5.30-5.27 (m, 1H), 4.82-4.80 (m, 1H), 4.77-4.75 (m, 1H), 3.81-3.60 (m, 3H), 3.40 (s, 3H), 3.15 (s, 6H), 2.03 (s, 3H);  $^{13}\text{C}$  NMR (DMSO- $d_6$ )  $\delta$  161.20, 159.98, 152.44, 150.35, 140.36, 125.54, 90.42, 87.57, 80.44, 66.20, 57.75, 25.88, 17.07.; MS (FAB $^+$ )  $m/e$  461 (M+H). Anal. Calcd for  $\text{C}_{15}\text{H}_{21}\text{N}_6\text{O}_3\text{I}$ : C, 39.14; H, 4.60; N, 18.26. Found: C, 39.18; H, 4.58; N, 18.01.

**3'-Deoxy-3'-iodo-2-N-isobutyryl-2'-O-methylguanosine (12j).** A solution **11c** (0.20g, 0.25mmol) was stirred with hexafluoroisopropanol (2ml) for 6 h and the reaction was worked up as in case of **12h** to afford 0.095g, (78% ) of **12j** as a colorless foam:  $^1\text{H}$  NMR (DMSO- $d_6$ )  $\delta$  12.17 (s, 1H), 11.64 (s, 1H), 5.79 (bs, 1H), 5.18 (bs, 1H), 4.80-4.68 (m, 2H), 3.40 (s, 3H), 3.26 (s, 3H), 3.80-3.53 (m, 3H), 2.8-2.70 (m, 1H), 1.05 (bs, 6H);  $^{13}\text{C}$  NMR (DMSO- $d_6$ )  $\delta$  180.21, 154.78, 148.43, 137.34, 120.13, 91.01, 87.28, 80.55, 66.05, 57.85, 34.73, 26.31, 18.88, 18.83; MS (FAB $^+$ )  $m/e$  478 (M+H). Anal. Calcd for  $\text{C}_{15}\text{H}_{20}\text{N}_5\text{O}_5\text{I}$ : C, 37.74; H, 4.50; N, 14.20. Found: C, 37.34; H, 4.34; N, 14.06.

**3'-tert -Butyldiphenylsilyl-2'-O-methyl-5'-O -phthalimido-5-methyluridine (14a).** From **13a** (5.5 g, 13.2 mmol) according to general procedure C was obtained crude **14a** in essentially quantitative yield, along with silyl by-products.

Purification on a short silica gel column (0 to 3% MeOH/CH<sub>2</sub>Cl<sub>2</sub>) gave 8.0 g (93%) of **14a**: *R<sub>f</sub>* 0.48 (1:1 CH<sub>2</sub>Cl<sub>2</sub>/EtOAc). <sup>1</sup>H NMR (DMSO-*d*<sub>6</sub>) δ 11.37 (s, 1H), 7.86 (s, 4H), 7.5-7.7 (m, 5H), 7.3-7.4 (m, 6H), 5.97 (d, *J*=5.82 Hz, 1H), 4.1-4.5 (m, 4H), 3.08 (s, 3H), 1.75 (s, 3H), 1.04 (s, 9H). Anal. Calcd for C<sub>35</sub>H<sub>37</sub>N<sub>3</sub>O<sub>8</sub>Si: C, 61.57; H, 5.90; N, 6.15. Found: C, 61.60; H, 5.93; N, 6.46.

**3'-*tert*-Butyldiphenylsilyl-2'-*O*-methyl-5'-*O* -phthalimidoadenosine (14b).** From **13b** (5.0 g, 11.7 mmol) according to general procedure C was obtained crude **13b** in essentially quantitative yield, along with silyl by-products. Purification on a short silica gel column (80:15:5 EtOAc/hexane/MeOH).gave 7.3 g (93%) of pure **14b**: *R<sub>f</sub>* 0.57 (10% MeOH/CH<sub>2</sub>Cl<sub>2</sub>); <sup>1</sup>H NMR (DMSO-*d*<sub>6</sub>) δ 8.37 (s, 1H), 8.07 (s, 1H), 7.82 (s, 4H), 7.5-7.8 (m, 4H), 7.2-7.5 (m, 6H), 6.14 (d, *J*=5.75 Hz, 1H), 4.6-4.8 (m, 1H), 4.2-4.4 (m, 3H), 3.9-4.2 (m, 1H), 3.34 (br s, 1H), 3.08 (s, 3H), 1.06 (s, 9H); HRMS (FAB<sup>+</sup>, CsI/NBA) calcd for C<sub>35</sub>H<sub>36</sub>N<sub>6</sub>O<sub>6</sub>Si 797.1520, found 797.1535. Anal. Calcd for C<sub>35</sub>H<sub>36</sub>N<sub>6</sub>O<sub>6</sub>Si•0.5 H<sub>2</sub>O: C, 62.39; H, 5.53; N, 12.47. Found: C, 62.53; H, 5.32; N, 12.44.

**3'-*O*-*tert*-Butyldiphenylsilyl-2'-*O*-methyl-5'-*O*- (methyleneimino)-5-methyluridine (15a).** 2'-*O*-Methyl-5'-*O*-phthalimido-5-methyluridine (2.90 g, 6.95 mmol) and imidazole (2.13 g, 31.3 mmole) were dissolved in dry DMF (35 mL) under an inert atmosphere, and TBDPSCl (2.71 mL, 10.42 mmol) was added. The reaction was stirred at room temperature for 48 h, then poured into EtOAc (100 mL) and water (100 mL). The organic layer was washed with water (3 x 100 mL), dried (MgSO<sub>4</sub>), and concentrated. The crude material was dissolved in dry CH<sub>2</sub>Cl<sub>2</sub> (70 mL), and methylhydrazine (0.44 mL, 8.34 mmole) was added dropwise at 0 °C. After 1 h, the mixture was filtered, and the filtrates washed well with CH<sub>2</sub>Cl<sub>2</sub>. Toluene (35 mL) was added to the combined filtrates, and the solution concentrated, then azeotroped with toluene. The residue was dissolved in EtOAc/MeOH (50 mL + 50 mL), formaldehyde (20 % w/w aqueous, 1.05 mL, 7.0 mmol) was added, and the mixture stirred 1 h at rt. The

solution was concentrated, then chromatographed (20% to 50% EtOAc/hexane, 4.5 x 15 cm) to provide 3.43 g (92%) of **15a** as a large foam:  $R_f$  0.53 (50% EtOAc/hexane);  $^1\text{H}$  NMR ( $\text{CDCl}_3$ )  $\delta$  8.44 (bs, 1H), 7.73-7.30 (m, 10H), 7.25 (s, 1H), 6.89 (d,  $J=7.9$  Hz, 1H), 6.44 (d,  $J=7.9$  Hz, 1H), 5.90 (d,  $J=2.3$  Hz, 1H), 4.50-4.05 (m, 3H), 3.33 (s, 3H), 3.18 (m, 1H), 1.80 (s, 3H), 1.11 (s, 9H). Anal. Calcd for  $\text{C}_{28}\text{H}_{35}\text{N}_3\text{O}_6\text{Si}$ : C, 62.55; H, 6.56; N, 7.81. Found: C, 62.47; H, 6.46; N, 7.66.

**3'-O-tert-Butyldiphenylsilyl-4-N-benzoyl-2'-O-methyl-5'-O-(methyleneimino)-5-methylcytidine (15b).** To 1,2,4-triazole (11.88 g, 172.0 mmol) in dry MeCN (75 mL) under argon at 0 °C was added  $\text{POCl}_3$  (3.73 mL, 40 mmol) in MeCN (25 mL) dropwise with vigorous stirring.  $\text{Et}_3\text{N}$  (27.9 mL, 200 mmol) was added dropwise over 0.5 h, and the thick suspension was stirred at 0 °C for an additional 0.5 h. A solution of **15a** (5.40 g, 10.0 mmol) in MeCN (50 mL) was then added dropwise over 0.5 h, and the mixture allowed to warm to rt over 3 h. The mixture was then cooled to 0 °C, and  $\text{Et}_3\text{N}$  (28 mL) and water (2.8 mL) were added, the mixture allowed to warm to room temperature with stirring, then concentrated to a small volume. The residue was partitioned between EtOAc (200 mL) and 5%  $\text{NaHCO}_3$  (100 mL), and the organic layer washed with 5%  $\text{NaHCO}_3$  (2 x 200 mL), water (3 x 200 mL), and brine, then dried ( $\text{MgSO}_4$ ) and concentrated. The resulting foam was azeotroped with dry toluene (2 x 100 mL) to provide the triazolidine in essentially quantitative yield, which was used immediately for the next step:  $R_f$  0.28 (50% EtOAc/hexane). In a separate reaction vessel, sodium hydride (60% w/w, 1.60 g, 40 mmol) was added portionwise to benzamide (4.85 g, 40 mmol) in dry 1,4-dioxane (100 mL), and the resulting mixture stirred for 1 h at rt. This suspension was then added *via* cannula to a solution of the triazolidine obtained above in dry 1,4-dioxane (100 mL), and the mixture stirred at rt for 3 h. AcOH (2.25 mL, 40 mmol) was added, and the mixture diluted with EtOAc (100 mL) and hexane (100 mL), then washed with 5%  $\text{NaHCO}_3$ , water, dried ( $\text{MgSO}_4$ ), concentrated, and chromatographed (0 to 30% EtOAc/hexane) to provide 5.16 g (80%) of **15b**:  $R_f$  0.71



(30% EtOAc/hexane);  $^1\text{H}$  NMR ( $\text{CDCl}_3$ )  $\delta$  13.26 (s, 1H), 8.31 (d, 2H), 7.75-7.25 (m, 14H), 6.91 (d,  $J=7.9$  Hz, 1H), 6.47 (d,  $J=7.9$  Hz, 1H), 5.90 (d,  $J=1.9$  Hz, 1H), 4.50 (dd, 1H), 4.31 (m, 1H), 4.20 (dd, 1H), 4.11 (dd, 1H), 3.36 (s, 3H), 3.20 (dd, 1H), 1.99 (d,  $J=1.0$  Hz, 3H), 1.10 (s, 9H). Anal. Calcd for  $\text{C}_{35}\text{H}_{40}\text{N}_4\text{O}_6\text{Si}$ : C, 65.60; H, 6.29; N, 8.74. Found: C, 65.25; H, 6.34; N, 8.42.

**3'-O-tert-Butyldiphenylsilyl-2'-O-methyl-5'-O- (methyleneimino)-5-methylcytidine (15c).** The triazolide (38 g, 64 mmol) obtained from the procedure given for **15b** was dissolved in dry 1,4-dioxane (200 mL), cooled on ice, and ca 20 mL of condensed anhydrous  $\text{NH}_3$  was added. The was allowed to warm to rt over 2h, with stirring, and then concentrated to a syrup, which was dissolved in  $\text{CH}_2\text{Cl}_2$  (500 mL) washed with water, dried ( $\text{MgSO}_4$ ), concentrated, and chromatographed (0 to 5% MeOH/ $\text{CH}_2\text{Cl}_2$ ) to provide 26.6 g (77%) of **15c**:  $R_f$  0.27 (10% MeOH/ $\text{CH}_2\text{Cl}_2$ );  $^1\text{H}$  NMR ( $\text{CDCl}_3$ )  $\delta$  7.62 (m, 4H), 7.45-7.25 (m, 7H), 6.84 (d,  $J=8.1$  Hz, 1H), 6.42 (d,  $J=8.1$  Hz, 1H), 5.88 (s, 1H), 4.53 (dd, 1H), 4.32 (m, 1H), 4.23 (dd, 1H), 4.00 (dd, 1H), 3.46 (s, 3H), 3.24 (dd, 1H), 1.74 (s, 3H), 1.08 (s, 9H). Anal. Calcd for  $\text{C}_{28}\text{H}_{36}\text{N}_4\text{O}_5\text{Si}$ : C, 62.66; H, 6.76; N, 10.44. Found: C, 62.26; H, 6.53; N, 10.23.

**3'-tert-Butyldiphenylsilyl-2'-O-methyl-5'-O-(methyleneimino)adenosine (15d).** From **14b** (2.0 g, 3.0 mmol) according to general procedure D was obtained 1.3 g (79%) of **15d** after chromatography (70:27:3 EtOAc/hexane/MeOH):  $R_f$  0.43 (10% MeOH/ $\text{CH}_2\text{Cl}_2$ );  $^1\text{H}$  NMR ( $\text{DMSO}-d_6$ )  $\delta$  8.29 (s, 1H), 8.10 (s, 1H), 7.6-7.8 (m, 4H), 7.2-7.5 (m, 6H), 6.14 (d,  $J=5.75$  Hz, 1H), 4.6-4.8 (m, 1H), 4.2-4.4 (m, 3H), 3.9-4.2 (m, 1H), 3.34 (br s, 1H), 3.08 (s, 3H), 1.06 (s, 9H). Anal. Calcd for  $\text{C}_{28}\text{H}_{34}\text{N}_6\text{O}_4\text{Si}$ : C, 61.52; H, 6.27; N, 15.37. Found: C, 61.21; H, 6.19; N, 15.18.

**3'-De(oxyphosphinico)-3'-(methyleneimino)-5'-O-(4,4'-dimethoxytriphenylmethyl)-2'-O-methyl-5-methyluridylyl-(3' $\rightarrow$ 5')-3'-O-tert-butyldiphenylsilyl-2'-O-methyl-5-methyluridine (16a).** 3'-Deoxy-5'-O-(4,4'-

dimethoxytrityl)-3'-iodo-2'-*O*-methyl-5-methyluridine (343 mg, 0.50 mmol) and 3'-*O*-*tert*-butyldiphenylsilyl-2'-*O*-methyl-5'-*O*-(methyleneimino)-5-methyluridine (807 mg, 1.50 mmol) were combined, azeotroped with dry benzene (5 mL), dissolved in dry benzene (2.5 mL), degassed (argon, 0.5 h), and heated to 80 °C in an oil bath. A degassed (argon, 0.5 h) solution of bis(trimethylstannyl)benzopinacolate (484 mg, 0.70 mmol) in dry benzene (3.5 mL) was then added via syringe pump over 24 h (145  $\mu$ L/h flow rate). The solution was stirred at 80 °C for an additional 16 h, allowed to cool, diluted with EtOAc (30 mL) and 10% aqueous KF (10 mL), and stirred vigorously for 24 h. The organic layer was dried (MgSO<sub>4</sub>), concentrated, dissolved in the minimum amount of CH<sub>2</sub>Cl<sub>2</sub>, and applied to a column of silica (3.5 x 15 cm). Elution with 20% EtOAc/hexane (5 column volumes) provided tin by-products and benzophenone; with 50% EtOAc/hexane (20 column volumes) provided unreacted oxime (0.60 g, >90% of unreacted material), followed by minor side products; and elution with 10% MeOH/CH<sub>2</sub>Cl<sub>2</sub> afforded the hydroxylamino linked dimer **16a** (0.39 g, 70%, based on starting iodide): *R<sub>f</sub>* 0.37 (10% MeOH/CH<sub>2</sub>Cl<sub>2</sub>); <sup>1</sup>H NMR (CDCl<sub>3</sub>)  $\delta$  8.79 (bs, 1H), 8.60 (bs, 1H), 7.83 (s, 1H), 7.70-7.20 (m, 19H), 7.16 (s, 1H), 6.83 (m, 4H), 5.91 (s, 1H), 5.82 (d, *J*=2.3 Hz, 1H), 5.46 (bs, 1H), 1.70 (s, 3H), 1.38 (s, 3H), 1.09 (s, 9H), and other protons. Anal. Calcd for C<sub>60</sub>H<sub>69</sub>N<sub>5</sub>O<sub>13</sub>Si•H<sub>2</sub>O: C, 64.67; H, 6.42; N, 6.28. Found: C, 64.61; H, 6.24; N, 6.13.

**3'-De(oxyphosphinico)-3'-(methyleneimino)-5'-*O*-(4,4'-dimethoxytriphenylmethyl)-2'-*O*-methyl-5'-methyluridylyl-(3'→5')-3'-*O*-*tert*-butyldiphenylsilyl-2'-*O*-methyl-5-methylcytidine (**16b**).** A solution of **12a** (0.310 g, 0.5 mmol) and **15c** (0.810 g, 1.5 mmol) in benzene was treated with **8** (0.483 g, 0.7 mmol) in degassed benzene (5 mL) *via* a syringe pump as described for **16a**. The crude residue was purified by flash chromatography using 5-10% MeOH in CH<sub>2</sub>Cl<sub>2</sub> as the eluent to furnish 0.385 g (75%) of **16b** as a colorless foam: <sup>1</sup>H NMR (CDCl<sub>3</sub>)  $\delta$  7.68-7.26 (m, 24H), 5.91 (bs, 1H), 5.84 (bs, 1H), 5.58 (s, 1H), 4.30-3.20 (m, 16H), 3.10-2.75 (m, 2H), 1.71 (s, 3H), 1.47 (s, 3H), 1.09-1.06 (m, 18H); MS (FAB<sup>+</sup>) *m/e* 1031

(M+H). Anal. Calcd for C<sub>55</sub>H<sub>70</sub>N<sub>6</sub>O<sub>10</sub>Si<sub>2</sub>: C, 64.05; H, 6.84; N, 8.15. Found: C, 63.65; H, 6.91; N, 8.24.

**3'-De(oxyphosphinico)-3'-(methyleneimino)-5'-O-(4,4'-dimethoxytriphenylmethyl)-6-N-[1-(dimethylamino)ethylene]-2'-O-methyladenosyl-(3'→5')-3'-O-tert-butylidiphenylsilyl-2'-O-methyl-5-methyluridine (16c)**

A mixture of **12b** (1.09 g, 1.5 mmol) and **15a** (2.4 g, 4.5 mmol) in degassed benzene (8 mL) was treated with **8** (1.5 g, 2.1 mmol) in degassed benzene (10 mL) *via* a syringe pump as described for **16a**. The crude residue was purified by flash chromatography using CH<sub>2</sub>Cl<sub>2</sub>/EtOAc/MeOH (80:17:3) as the eluent to furnish 0.91 g (52%) of **16c** as a colorless foam: <sup>1</sup>H NMR (CDCl<sub>3</sub>) δ 8.59 (s, 1H), 8.17 (s, 1H), 7.68-7.17(m, 20H), 6.82-6.77 (m, 4H), 6.22 (bs 1H), 5.80 (bs, 1H), 5.45 (m, 1H), 4.50-2.50 (m, 31H), 2.14 (s, 3H), 1.70 (s, 3H), 1.06 (S, 9H); MS (FAB<sup>+</sup>) *m/e* 1174 (M+H).

Anal. Calcd for C<sub>64</sub>H<sub>75</sub>N<sub>9</sub>O<sub>11</sub>Si•MeOH: C, 64.71; H, 6.60; N, 10.45. Found: C, 65.00; H, 6.57; N, 10.18.

**3'-De(oxyphosphinico)-3'-(methyleneimino)-5'-O-(4,4'-dimethoxytriphenylmethyl)-2-N-isobutyryl-2'-O-methyl-guanosyl-(3'→5')-3'-O-tert-butylidiphenylsilyl-2'-O-methyl-5-methyluridine (16d)** A mixture of **12c** (2.0 g, 2.5 mmol) and **15a** (4.3 g, 8.0) mmol in degassed benzene was treated with **8** (2.73 g, 3.8 mmol) in degassed benzene *via* a syringe pump as described for **16a**. The crude residue was purified by flash chromatography using the usual conditions, then treated with DMTCl in pyridine in presence of DMAP for 12 h, and finally re-purified to give 1.2 g (40%) of **16d** as a light yellow foam: <sup>1</sup>H NMR (DMSO-*d*<sub>6</sub>) δ 12.13 (s, 1H), 11.55 (s, 1H), 11.33 (s, 1H), 8.04 (s, 1H), 7.65-7.16 (m, 19H), 6.81-6.77 (m, 4H), 6.55 (m, 1H), 5.99 (bs, 1H), 5.84 (d, *J*=6 Hz, 1H), 4.3-4.04 (m, 4H), 3.68-2.57 (m, 23H), 1.63 (s, 3H), 1.14-0.99 (m, 15H); MS (FAB<sup>+</sup>) *m/e* 1191 (M+H). Anal. Calcd for C<sub>64</sub>H<sub>74</sub>N<sub>8</sub>O<sub>13</sub>Si•0.5 H<sub>2</sub>O: C, 64.04; H, 6.30; N, 9.33. Found: C, 63.78; H, 6.35; N, 9.13.

**3'-De(oxyphosphinico)-3'-(methyleneimino)-5'-O-(4,4'-dimethoxytriphenylmethyl)-2-N-isobutyryl-2'-O-methyl-guanosylyl-(3'→5')-3'-O-tert-butyldiphenylsilyl-2'-O-methyl-5-methylcytidine (16e).** A mixture of **12c** (0.250 g, 0.32 mmol) and **15c** (0.44 g, 0.82 mmol) mmol in degassed benzene (2 mL) was treated with **8** (0.354 g, 0.5 mmol) in benzene (2.5 mL) *via* a syringe pump as described for **16a**. The crude residue was purified by column chromatography on silica gel using EtOAc-hexane-MeOH (70:15:15) as the eluent. Appropriate fractions were combined and concentrated to give 0.211 g (55%) of **16e** as a colorless foam,; <sup>1</sup>H NMR (DMSO-*d*<sub>6</sub>) δ 12.16 (s, 1H), 11.6 (s, 1H), 8.08 (s, 1H) 7.66-7.17 (m, 19H), 7.00-6.66 (m, 6H), 6.06-5.85 (m, 3H), 4.45-3.00 (m, 26H), 1.72 (s, 3H), 1.25-0.87 (m, 15H); MS (FAB<sup>+</sup>) *m/e* 1191 (M+H). Anal. Calcd for C<sub>64</sub>H<sub>74</sub>N<sub>8</sub>O<sub>13</sub>Si•H<sub>2</sub>O•0.5 CH<sub>3</sub>CN: C, 63.47; H, 6.35; N, 9.68. Found: C, 63.27; H, 6.54; N, 10.04.

**3'-De(oxyphosphinico)-3'-(methyleneimino)-5'-O-(4,4'-dimethoxytriphenylmethyl)-2-N-isobutyryl-2'-O-methyl-guanosylyl-(3'→5')-3'-O-tert-butyldiphenylsilyl-2'-O-methyladenosine (16f).** A mixture of **12c** (0.076 g, 0.08 mmol), **15d** (0.160 g, 0.3 mmol) and **8** (0.107 g, 0.1 mmol) in degassed benzene (1.5 mL) was reacted according to general procedure E, then purified by chromatography (60:30:5-10% EtOAc/hexane/MeOH) to furnish 0.035 g (35%) of **16f** as a colorless foam: <sup>1</sup>H NMR (DMSO-*d*<sub>6</sub>) δ 12.20 (s, 1H), 11.60 (s, 1H), 8.29 (s, 1H), 7.71-7.15 (m, 20H), 6.83-6.77 (m, 4H), 6.53 (bs, 1H), 6.05-6.00 (m, 2H), 4.45-2.80 (m, 27H), 1.16-1.03 (m, 15H); MS (FAB<sup>+</sup>) *m/e* 1201 (M+H); HRMS (FAB<sup>+</sup>, CsI/NBA) calcd for C<sub>64</sub>H<sub>13</sub>N<sub>11</sub>O<sub>11</sub>Si+Cs<sup>+</sup> 1332.4315, found 1332.4328.

**3'-De(oxyphosphinico)-3'-(methyleneimino)-5'-O-(4,4'-dimethoxytriphenylmethyl)-6-N-[1-(dimethylamino)ethylene]-2'-O-methyl-adenosylyl-(3'→5')-3'-O-tert-butyldiphenylsilyl-2'-O-methyladenosine (16g).** A mixture of **12b** (0.107 g, 0.14 mmol), **15d** (0.230 g, 0.42 mmol) and **8** (0.153 g, 0.22 mmol) in degassed benzene (1mL) was reacted according to general

procedure E, then purified by chromatography (70:20:10 EtOAc/hexane/MeOH) to furnish 0.065 g (40%) of **16g** as a colorless foam:  $^1\text{H}$  NMR (DMSO- $d_6$ )  $\delta$  8.44 (s, 1H), 8.30 (s, 2H), 7.69-7.16 (m, 21H), 6.80-6.76 (m, 4H), 6.52-6.46 (m, 1H), 6.19 (bs, 1H), 6.01 (d,  $J=6\text{Hz}$ , 1H), 4.60-4.00 (m, 6H), 3.67 (s, 6H), 3.63-2.70 (m, 18H), 1.25 (s, 3H), 1.02 (s, 9H); MS (FAB $^+$ )  $m/e$  1183 (M+H). Anal. Calcd for  $\text{C}_{64}\text{H}_{74}\text{N}_{12}\text{O}_9\text{Si}\cdot\text{EtOAc}$ : C, 65.05; H, 6.58; N, 13.39. Found: C, 65.26; H, 6.71; N, 13.60.

**3'-De(oxyphosphinico)-3'-(methyleneimino)-5'-O-(tert-butyl)diphenylsilyl-6-N-(dimethylamino)methylene-2'-O-methyladenosyl-(3'→5')-3'-O-tert-butylidiphenylsilyl-2'-O-methyladenosine (16i).** A mixture of **12f** (0.427 g, 0.6 mmol) and **15d** (1.0 g, 1.82 mmol) and **8** (0.631 g, 0.91 mmol) were reacted according to general procedure E, then purified by column chromatography using 3-7% MeOH/ $\text{CH}_2\text{Cl}_2$  to give 0.203 g (30%) of **16i** as a colorless foam:  $^1\text{H}$  NMR (DMSO- $d_6$ )  $\delta$  8.91 (s, 1H), 8.44 (s, 1H), 8.42 (s, 1H), 8.34 (s, 1H), 8.06 (s, 1H), 7.69-7.32 (m, 22H), 6.54 (bs, 1H), 6.32 (bs, 1H), 5.94 (d,  $J=5.4\text{ Hz}$ , 1H), 4.60-3.50 (m, 12H), 3.34 (s, 6H), 3.17 (s, 3H), 3.13-2.9 (m, 5H), 1.02 (s, 9H), 0.92 (s, 9H). mass spectrum (FAB)  $m/z$  1105 ( $\text{MH}^+$ ). Anal. Calcd for  $\text{C}_{58}\text{H}_{72}\text{N}_{12}\text{O}_7\text{Si}_2$ : C, 63.02; H, 6.56; N, 15.20. Found: C, 62.73; H, 6.31; N, 14.89.

**3'-De(oxyphosphinico)-3'-(methyleneimino)-2'-O-methyl-5-methyluridylyl-(3'→5')-3'-O-tert-butylidiphenylsilyl-2'-O-methyl-5-methyluridine (16l).** A mixture of **12h** (0.215 g, 0.446 mmol), **15a** (0.720 g, 1.34 mmol) and **8** (0.450 g, 0.65 mmol) was reacted according to general procedure E, then chromatographed (5-10% MeOH in 2:1 EtOAc/Hexane) to afford 0.270 g (68%) of **16l**:  $^1\text{H}$  NMR (DMSO- $d_6$ )  $\delta$  11.38 (s, 1H), 11.37 (s, 1H), 8.00-7.45 (m, 12H), 6.59 (m, 1H), 5.93 (d,  $J=4\text{ Hz}$ , 1H), 5.74 (bs, 1H), 5.25 (bs, 1H), 4.30-2.7 (m, 18H), 1.74 (s, 6H), 1.05 (s, 9H). Anal. Calcd for  $\text{C}_{39}\text{H}_{51}\text{N}_5\text{O}_{11}\text{Si}\cdot 0.25\text{ H}_2\text{O}$ : C, 58.67; H, 6.50; N, 8.77. Found: C, 58.50; H, 6.53; N, 8.72.

**3'-N-(Benzyloxyamino)methyl-3'-deoxy-5'-O-(4,4'-dimethoxytriphenylmethyl)-2'-O-methyl-5-methyluridine (18).** A mixture of **12a** (2.0 g, 3.22 mmol), *O*-benzyl formaldoxime **17** (1.3 g, 9.61 mmol) and **8** (3.3 g, 4.83 mmol) was reacted according to general procedure E, then purified by flash chromatography using 60% EtOAc/hexane as the eluent to give 0.805 g (40%) of **18a** as a colorless foam:  $^1\text{H}$  NMR ( $\text{CDCl}_3$ )  $\delta$  8.66 (s, 1H), 7.71-7.26 (m, 16H), 5.86 (bs, 1H), 5.72 (bs, 1H), 4.61 (bs, 2H), 4.20-3.67 (m, 3H), 3.50 (s, 3H), 3.12-2.49 (m, 3H), 1.49 (s, 3H), 1.11 (s, 9H); MS (FAB $^+$ ) *m/e* 630 (M+H). Anal. Calcd for  $\text{C}_{35}\text{H}_{43}\text{N}_3\text{O}_6\text{Si}\cdot 0.25 \text{ H}_2\text{O}$ : C, 66.27; H, 6.91; N, 6.62. Found: C, 66.14; H, 6.81; N, 6.31.

### References For Supplementary Material

\*Author to whom correspondence should be addressed.

†Current address: Hewlett-Packard, 3500 Deer Creek Rd. 25-45, Palo Alto, CA 94304

<sup>1</sup>Debart, F.; Sanghvi, Y. S.; Cook, P. D. *J. Am. Chem. Soc.* **1992**, *114*, 4006-4007.

<sup>2</sup>Perbost, M.; Hoshiko, T.; Morvan, F.; Swayze, E.; Griffey, R. H.; Sanghvi, Y. S. *J. Org. Chem.* **1995**, *60*, 5150-5156.

<sup>3</sup>McBride, L. J.; Kierzek, R.; Beaucage, S. L.; Caruthers, M. H. *J. Am. Chem. Soc.* **1986**, *108*, 2040-2048.
